# Supplementary material for: Removal of CO2from CH4and CO2capture in the presence of H2O vapour in NOTT-401
Source: Royal Society of Chemistry journal article supplement (doi:10.1039/c5qi00049a), 2015-01-01
Supplement: c5qi00049a1.pdf [file c5qi00049a1.pdf]

## **ELECTRONIC SUPPLEMENTARY INFORMATION**

### **Removal of CO<sub>2</sub> from CH<sub>4</sub> and CO<sub>2</sub> capture in the presence of H<sub>2</sub>O vapour in NOTT-401**

Hugo A. Lara-García, Maximiliano R. Gonzalez, Juan H. González-Estefan, Pedro Sánchez-Camacho, Enrique Lima and Ilich A. Ibarra\*

*Instituto de Investigaciones en Materiales, Universidad Nacional Autónoma de México, Circuito Exterior s/n, CU, Del. Coyoacán, 04510, México D. F., Mexico.*

*E-mail: argel@unam.mx*

## 1. Scheme of the binuclear $[M_2(\mu_2\text{-OH})]$ building block

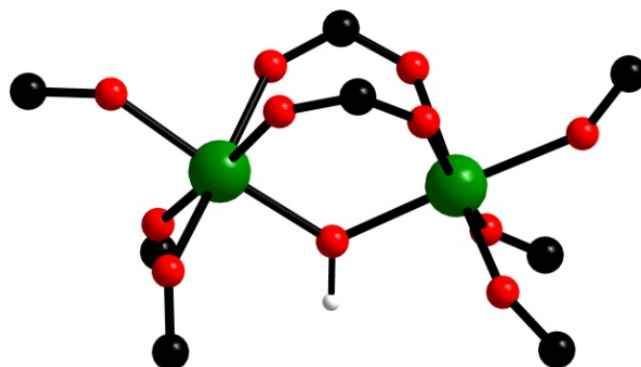

**Scheme S1:** Binuclear building block of two metal ions oxygen octahedra bridged by a  $\mu_2$ -hydroxo group. Green, red, black and white spheres represent M (metal ion such as In(III) or Sc(III)), O, C and H atoms, respectively.

## 2. Materials and Measurements

All reagents and solvents were used as received from commercial suppliers without further purification. Powder X-ray diffraction (PXRD) data were collected under ambient conditions on a Bruker AXD D8 Advance diffractometer operated at 160 W (40 kV, 40 mA) for Cu  $K\alpha_1$  ( $\lambda = 1.5406 \text{ \AA}$ ). Thermal gravimetric analysis (TGA) was performed under  $N_2$  at a scan rate of  $2 \text{ }^\circ\text{C}/\text{min}$  using a TA Instruments Q500HR analyser.  $N_2$  adsorption was carried out in a conventional volumetric technique by a Micromeritics ASAP 2020 sorptometer. The surface area was calculated using the BET method based on adsorption data in the partial pressure ( $p/p_0$ ) range 0.01 to 0.04. Dynamic and isothermal experiments were performed using a humidity-controlled thermobalance (TA Instruments, model Q5000SA) at  $30 \text{ }^\circ\text{C}$  and a relative humidity (RH) of 40%. A catalytic reactor system (BEL-REA, BEL Japan) coupled to a Bruker TENSER 27 FTIR was employed to measure the gas selectivity.

### 3. TGA plots

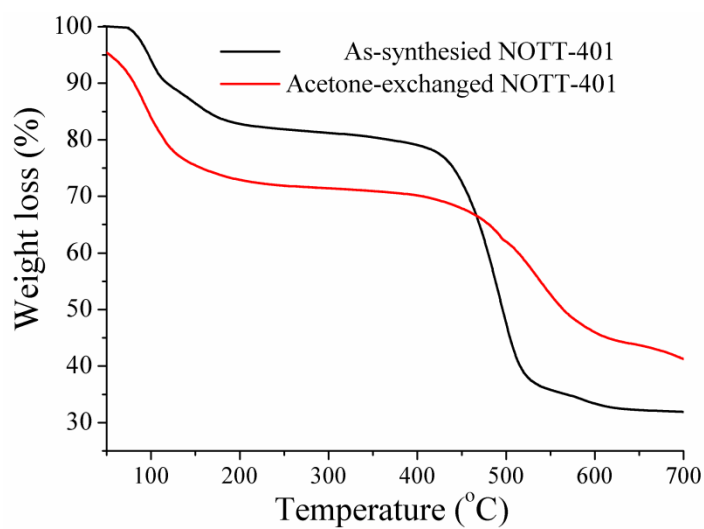

**Fig. S1:** TGA analyses of as-synthesised NOTT-401 (black line) and acetone-exchanged NOTT-401 (red line).

### 4. Powder X-ray Diffraction Patterns

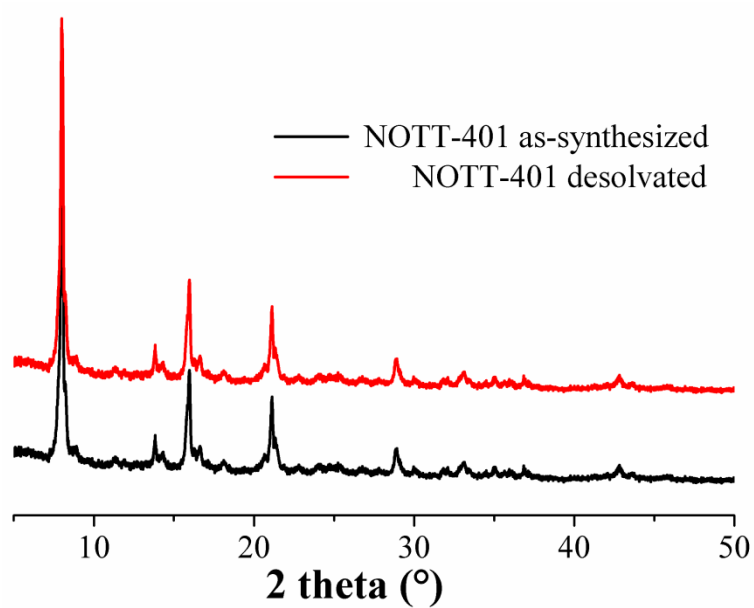

**Fig. S2:** PXRD patterns of as-synthesised (black) and desolvated (red) NOTT-401.

## 5. Catalytic Reactor System (BEL-REA) for the Gas CO<sub>2</sub> and CH<sub>4</sub> Selectivity Experiments

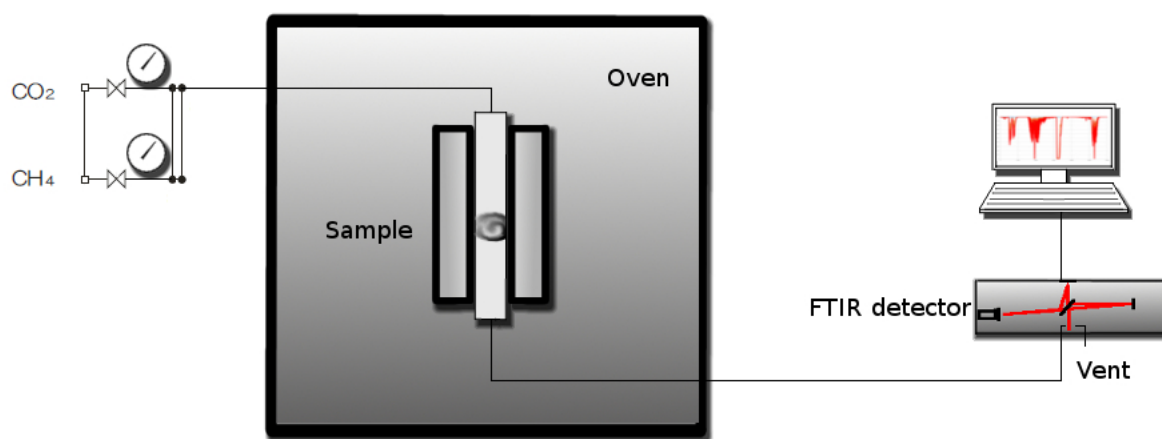

**Fig. S3:** Catalytic reactor system (BEL-REA) system.

## 6. FTIR Spectra

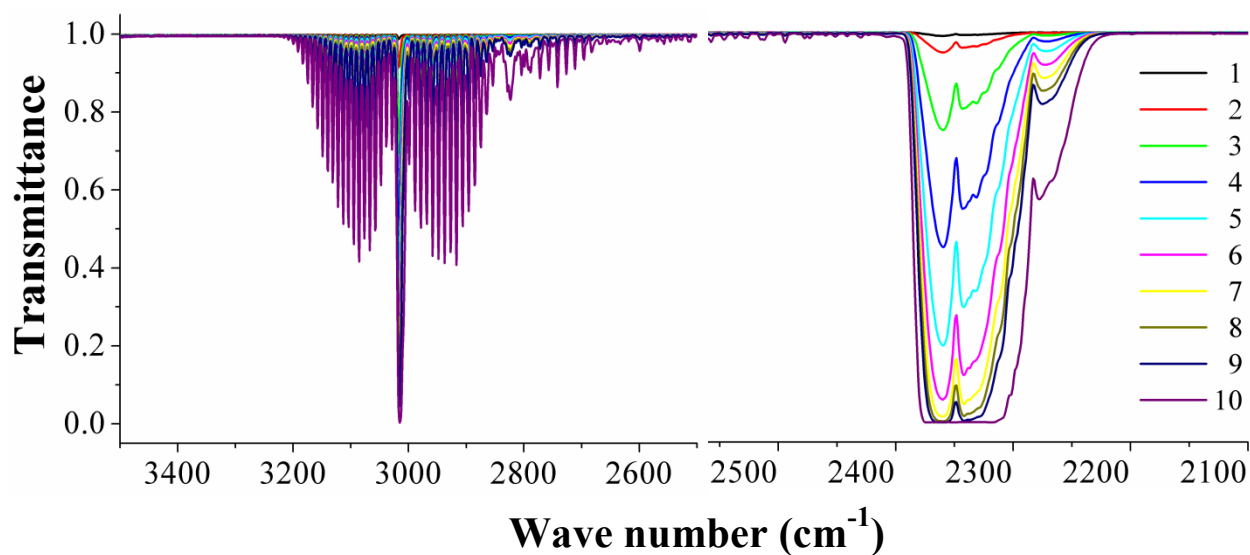

**Fig S4:** FTIR spectra of the resulting binary equimolar (0.13 mmol min<sup>-1</sup>) gas-mixture flow (that passed through the activated NOTT-401 sample).



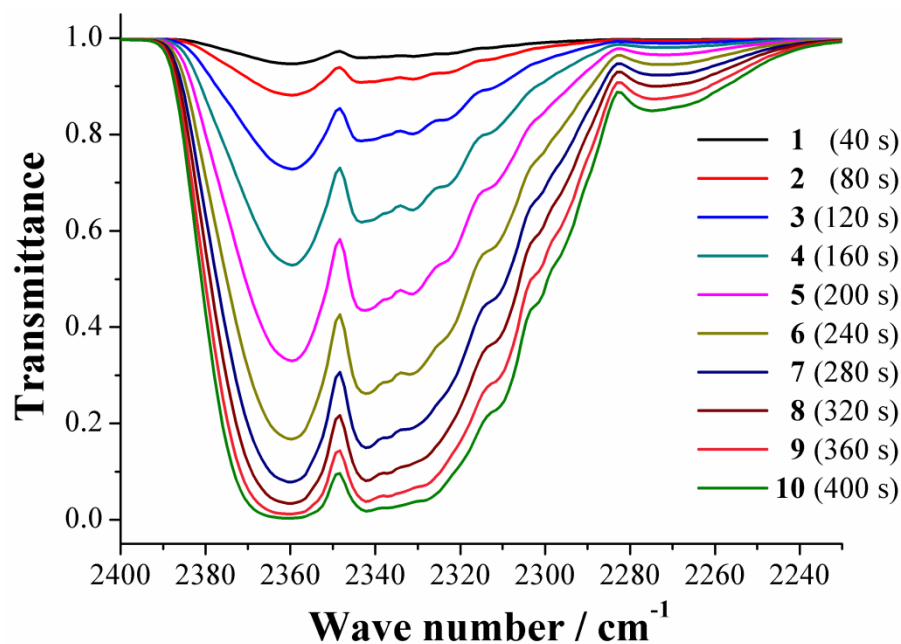

**Fig S5:** FTIR spectra of the resulting flow of only CO<sub>2</sub> gas (0.13 mmol min<sup>-1</sup>) that passed through the activated NOTT-401 sample.

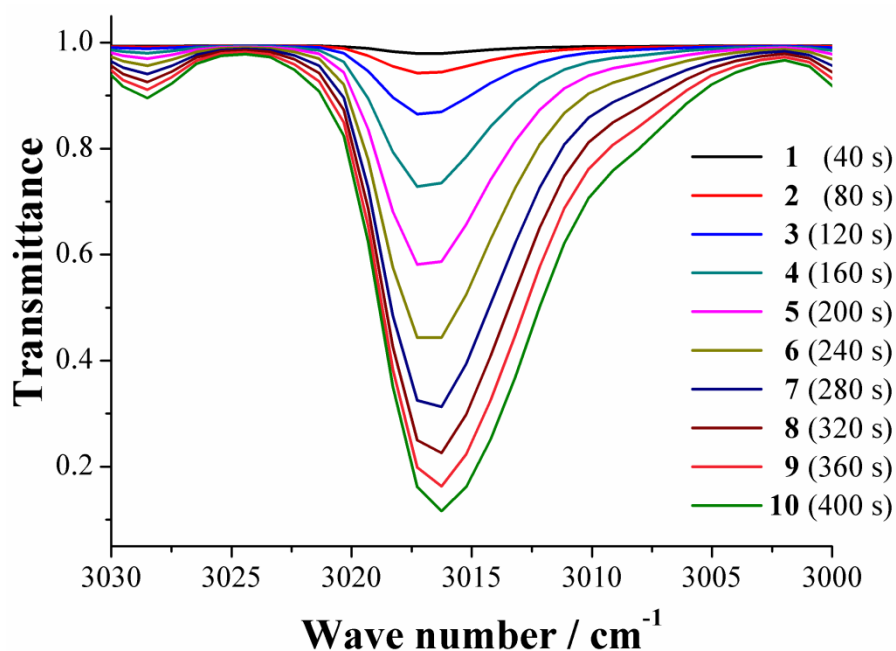

**Fig S6:** FTIR spectra of the resulting flow of only CH<sub>4</sub> gas (0.13 mmol min<sup>-1</sup>) that passed through the activated NOTT-401 sample.

## 7. Polynomial Regressions

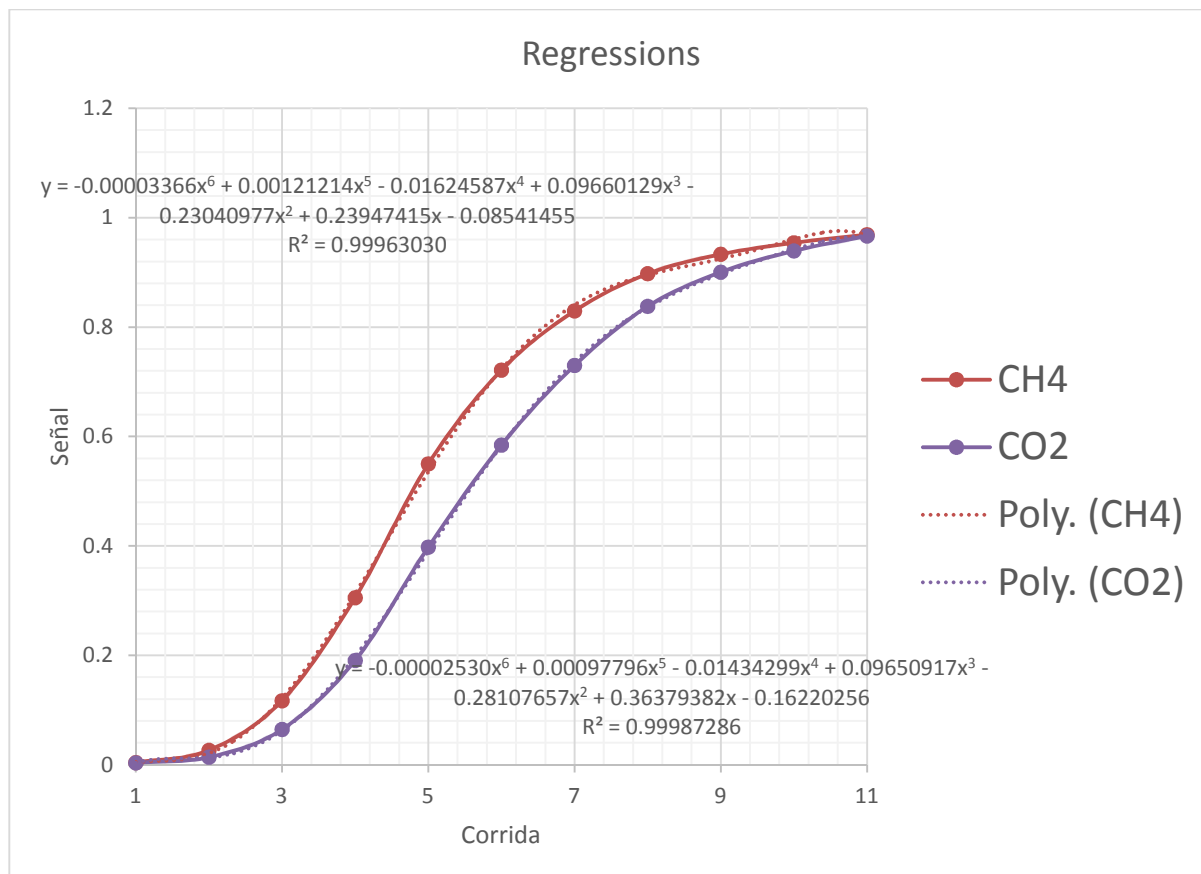

**Fig S7:** Polynomial regressions of the normalised intensities on Fig. 2 left.

By taking the derivative of both functions:

$$f(x) = -0.00003366x^6 + 0.00121214x^5 - 0.01624587x^4 + 0.09660129x^3 - 0.23040977x^2 + 0.23947415x - 0.08541455$$

$$g(x) = -0.00002530x^6 + 0.00097796x^5 - 0.01434299x^4 + 0.09650917x^3 - 0.28107657x^2 + 0.36379382x - 0.16220256$$

it is possible to plot both derivative functions ( $df(x)/dx$  and  $dg(x)/dx$ ) and find the maximum of both derivates. The difference of these derivates is equal to 0.59 scan which corresponds to  $\sim 23.53$  s.

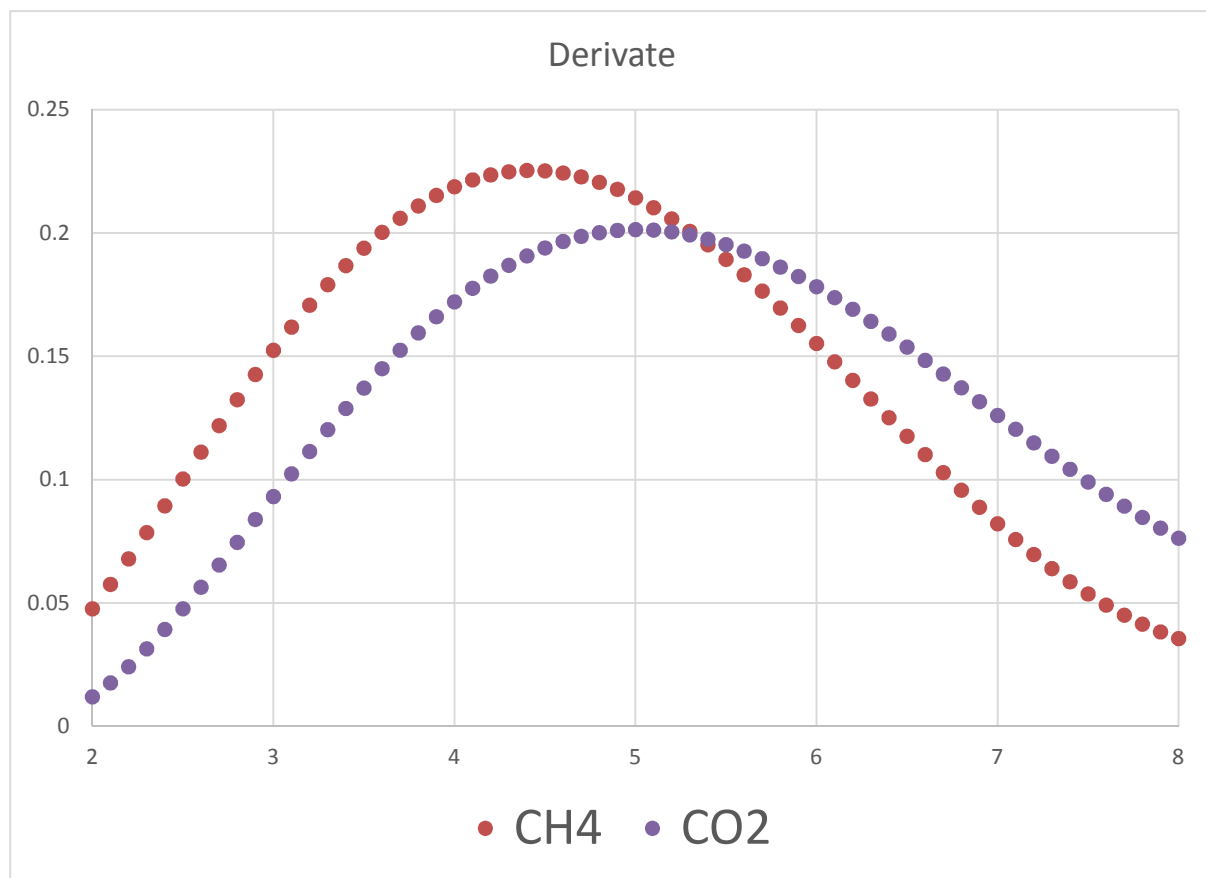

**Fig. S8:** Derivate functions ( $df(x)/dx$  and  $dg(x)/dx$ ) coming from polynomial regressions of the normalised intensities on Fig. 2 left. Methane in red and carbon dioxide in blue.

## 8. Normalised characteristic FTIR intensities of CO<sub>2</sub> and CH<sub>4</sub> as a function of the number of scans

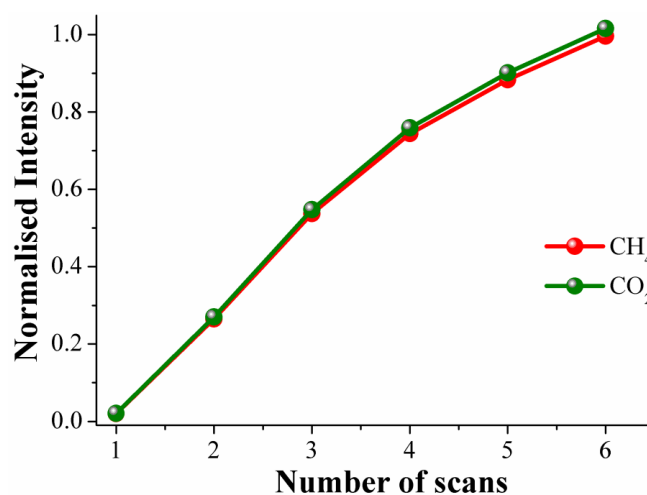

**Fig. S9:** Normalised characteristic FTIR intensities of CO<sub>2</sub> and CH<sub>4</sub> as a function of the number of scans from a resulting exit exhaust of the binary equimolar (0.13 mmol min<sup>-1</sup>) gas-mixture of CO<sub>2</sub> and CH<sub>4</sub> in PCM-14.

## 9. PXRD and Kinetic Isotherms

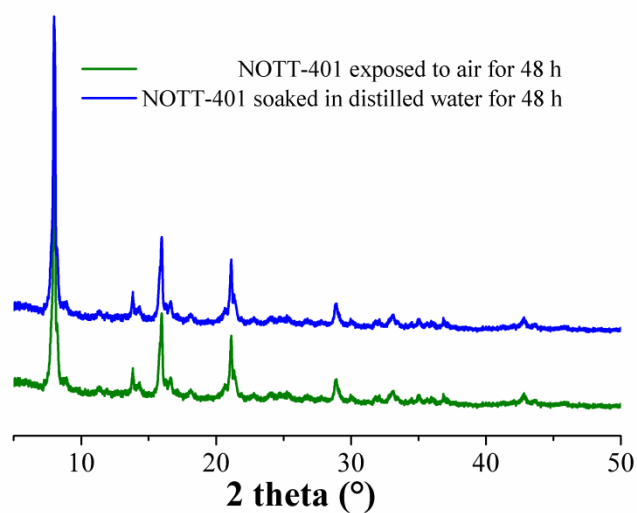

**Fig. S10:** Powder X-ray diffractions patterns of NOTT-401 after being exposed to air (green) and soaked in distilled water (blue) for 48 h.

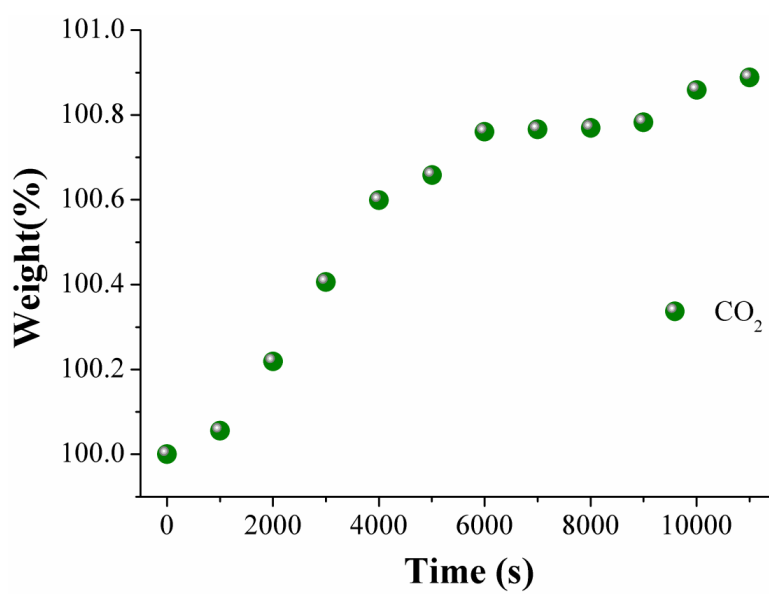

**Fig. S11:** Kinetic isotherms carried out at 30 °C and 40% RH with a CO<sub>2</sub> flow of 60 mL/min in PCM-14.
